# Supplementary material
Source: MDPI journal article supplement (https://www.mdpi.com/2304-6740/11/4/151)
Supplement: s1 [file s1]

# SUPPLEMENTARY

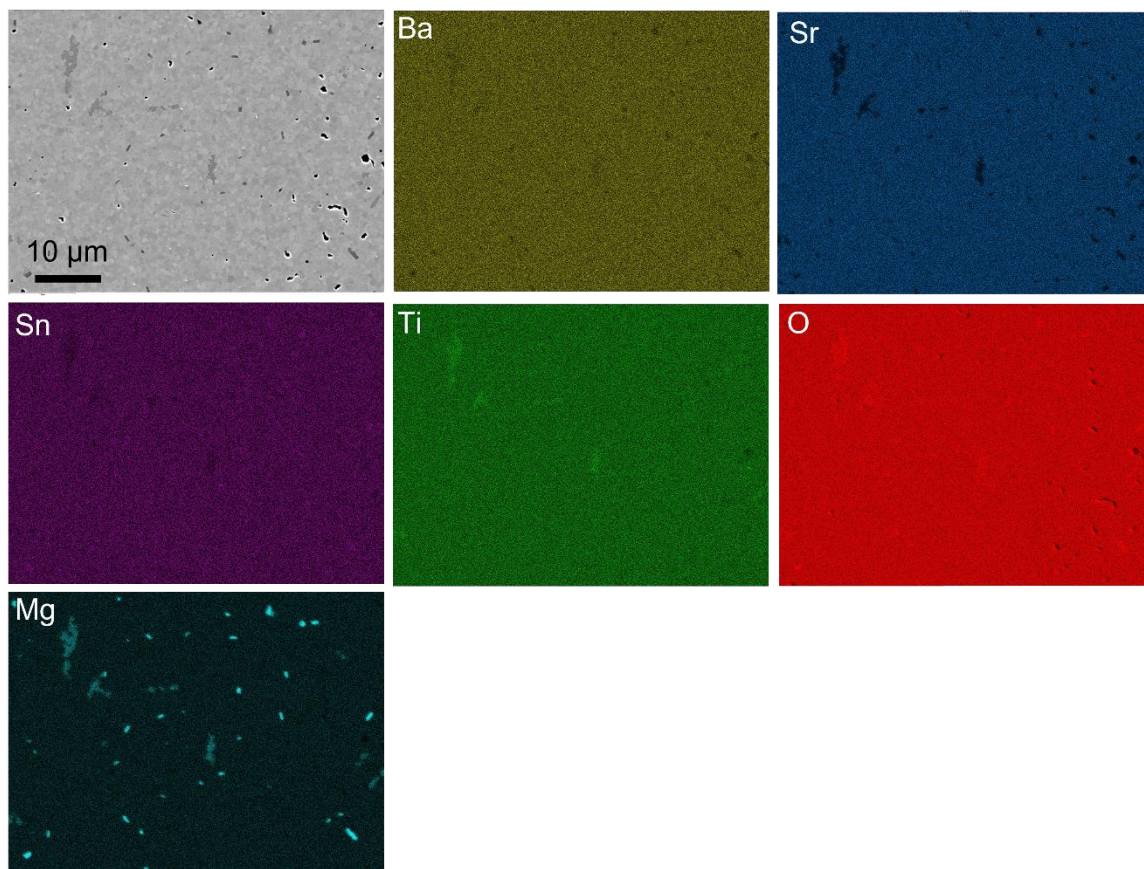

Figure S1. FESEM-EDX mapping of BSSnT-Mg illustrating the occurrence of Mg-rich phase for this composition.

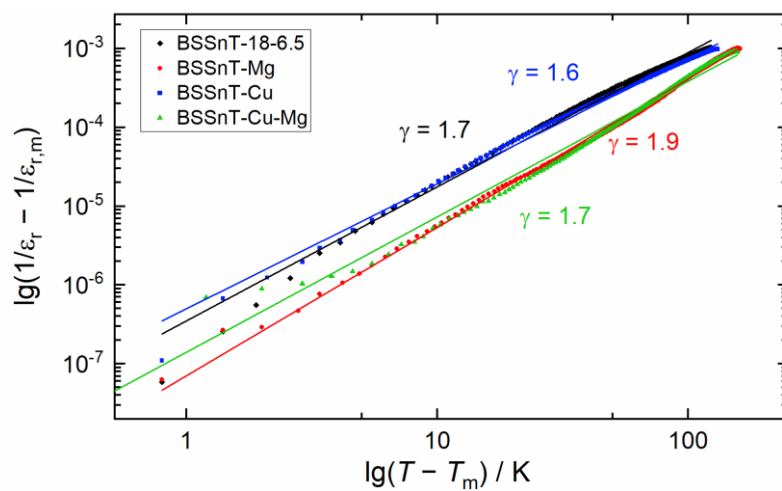

Figure S2. Plot of  $\lg(1/\epsilon_r - 1/\epsilon_{r,m})$  versus  $\lg(T - T_m)$  and fitted curves at 1 kHz for BSSnT-18-6.5 ceramics with different additives.

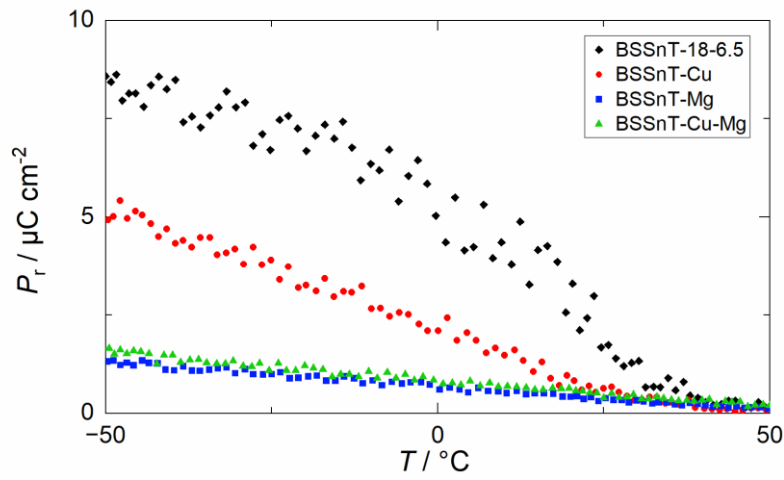

Figure S3. Temperature-dependent measurement of remanent polarization  $P_r$  for BSSnT-18-6.5 with different additives measured at  $2 \text{ V } \mu\text{m}^{-1}$  and 10 Hz.

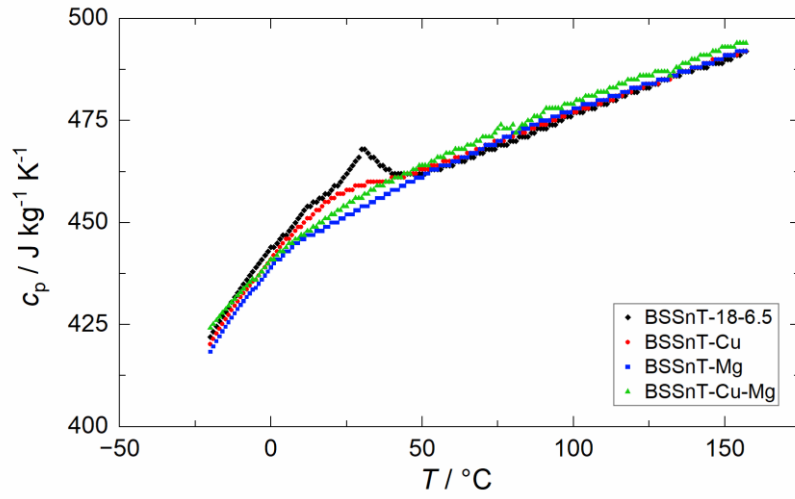

Figure S4. Specific heat capacity  $c_p$  in dependence of temperature  $T$  for BSSnT-18-6.5 with different additives.
